# Supplementary material for: Insights into the Existence of Isomeric Plastomes in Cupressoideae (Cupressaceae)
Source: PubMed Central journal article supplement — Genome Biol Evol. 2017 Apr 1;9(4):1110–9. doi: 10.1093/gbe/evx071 (PMC5408090; doi:10.1093/gbe/evx071), 2017-04-01
Supplement: evx071_Supp.pdf [file evx071_Supp.pdf]

Figure S1

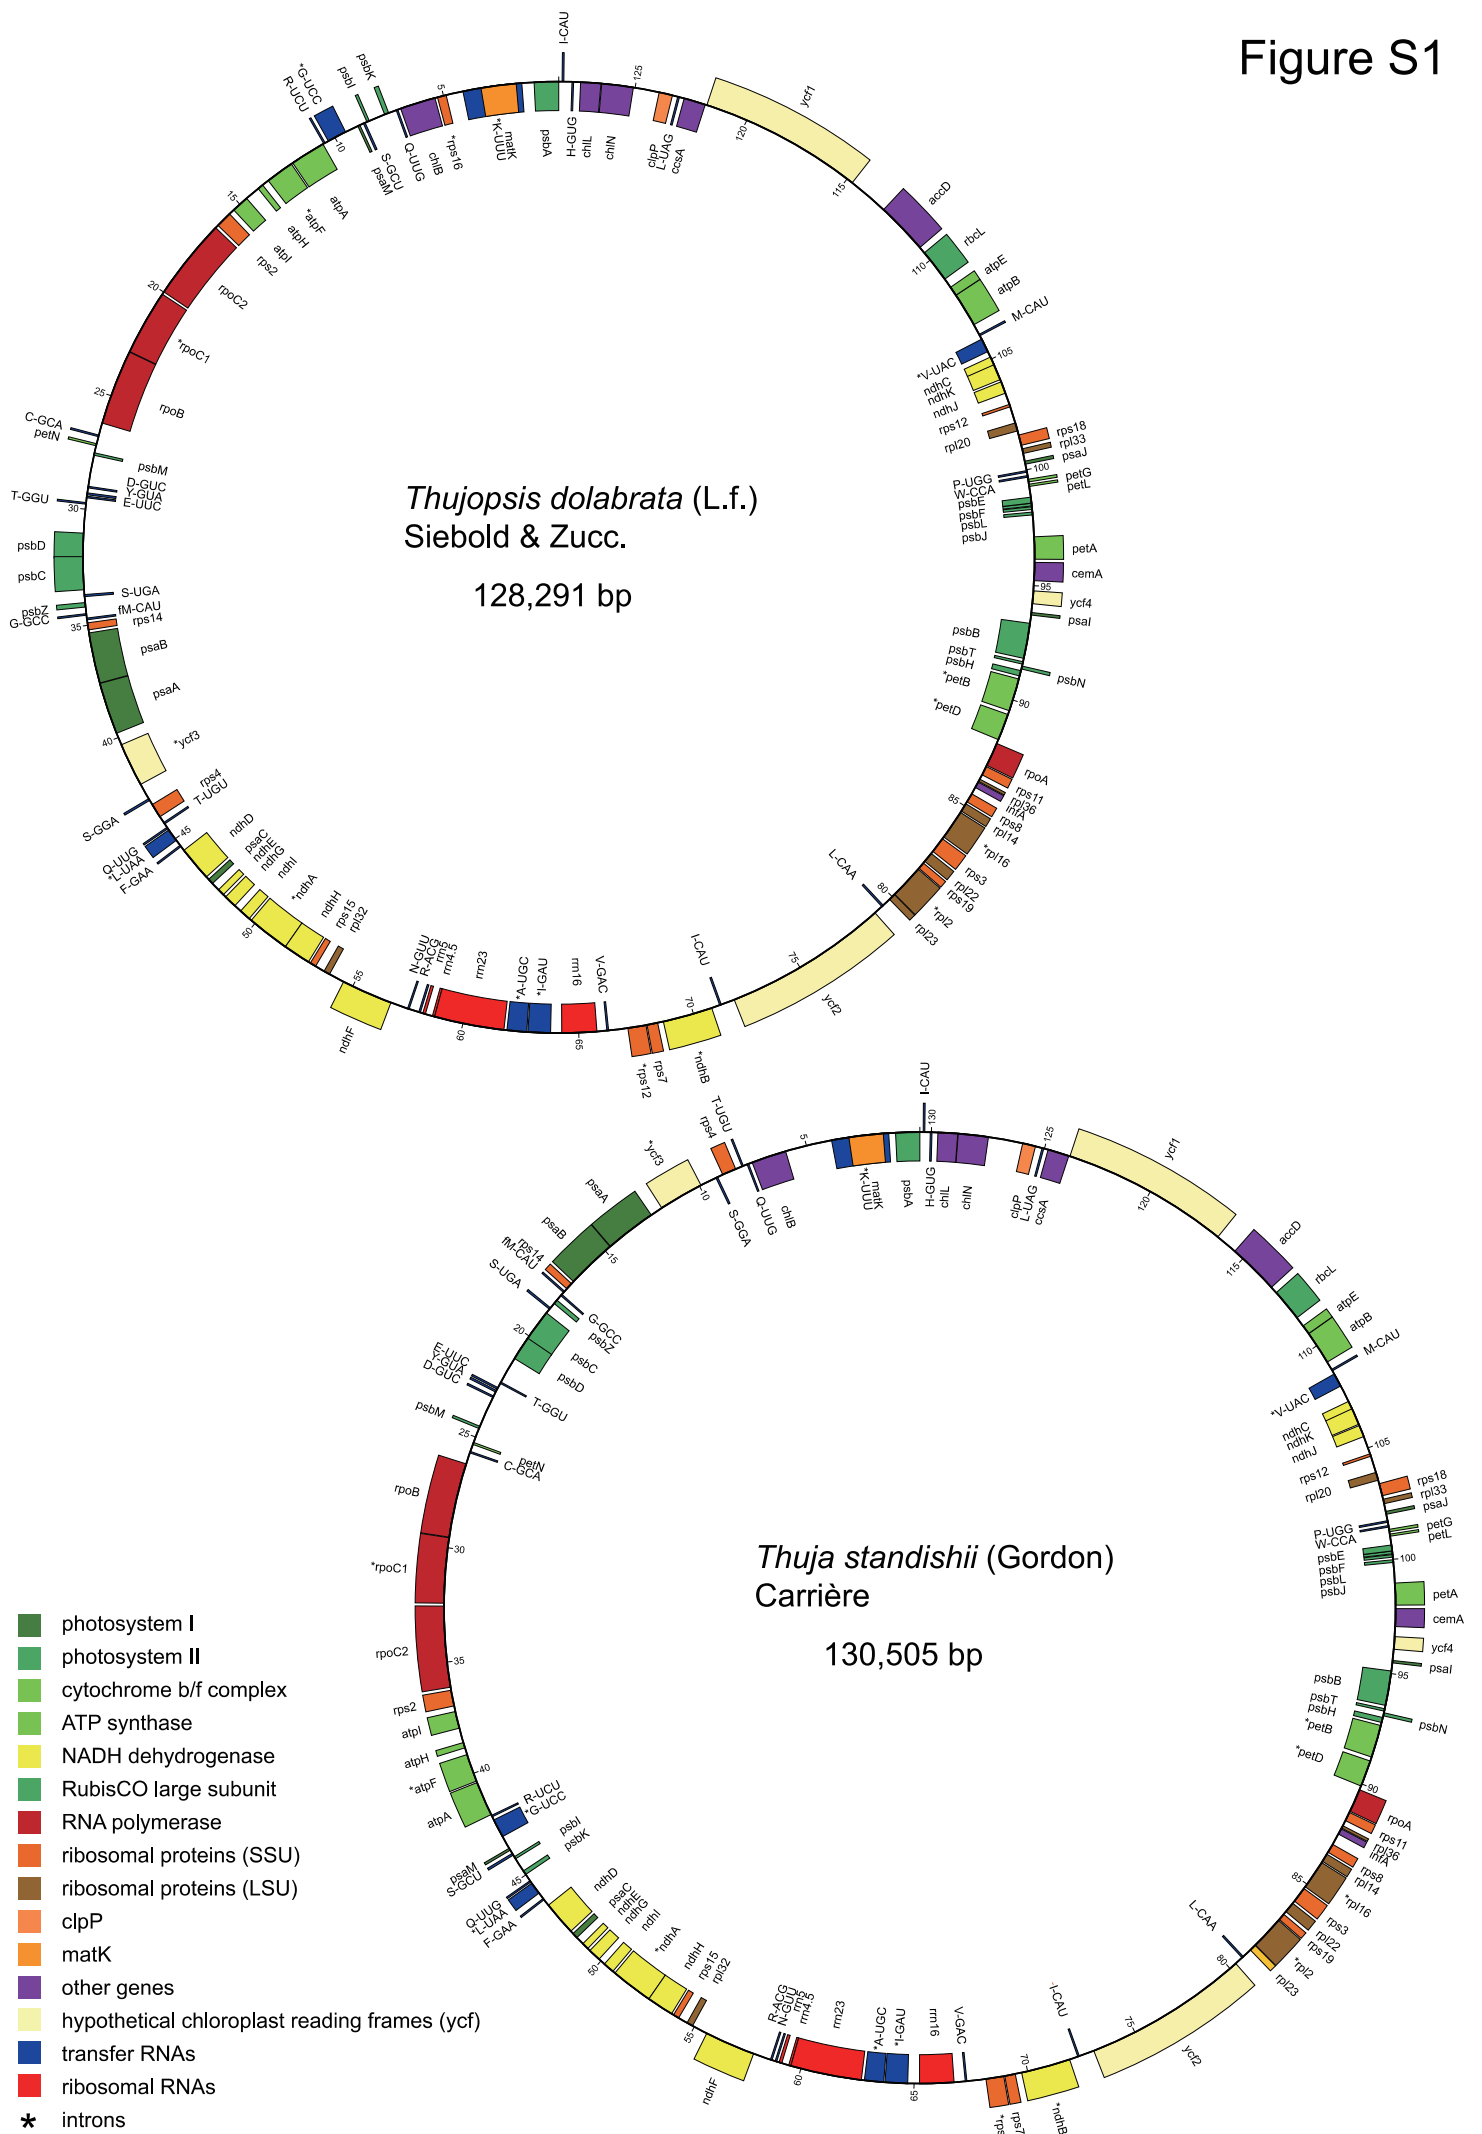

*Chamaecyparis lawsoniana*  
(A. Murray bis) Parl.

127,064 bp

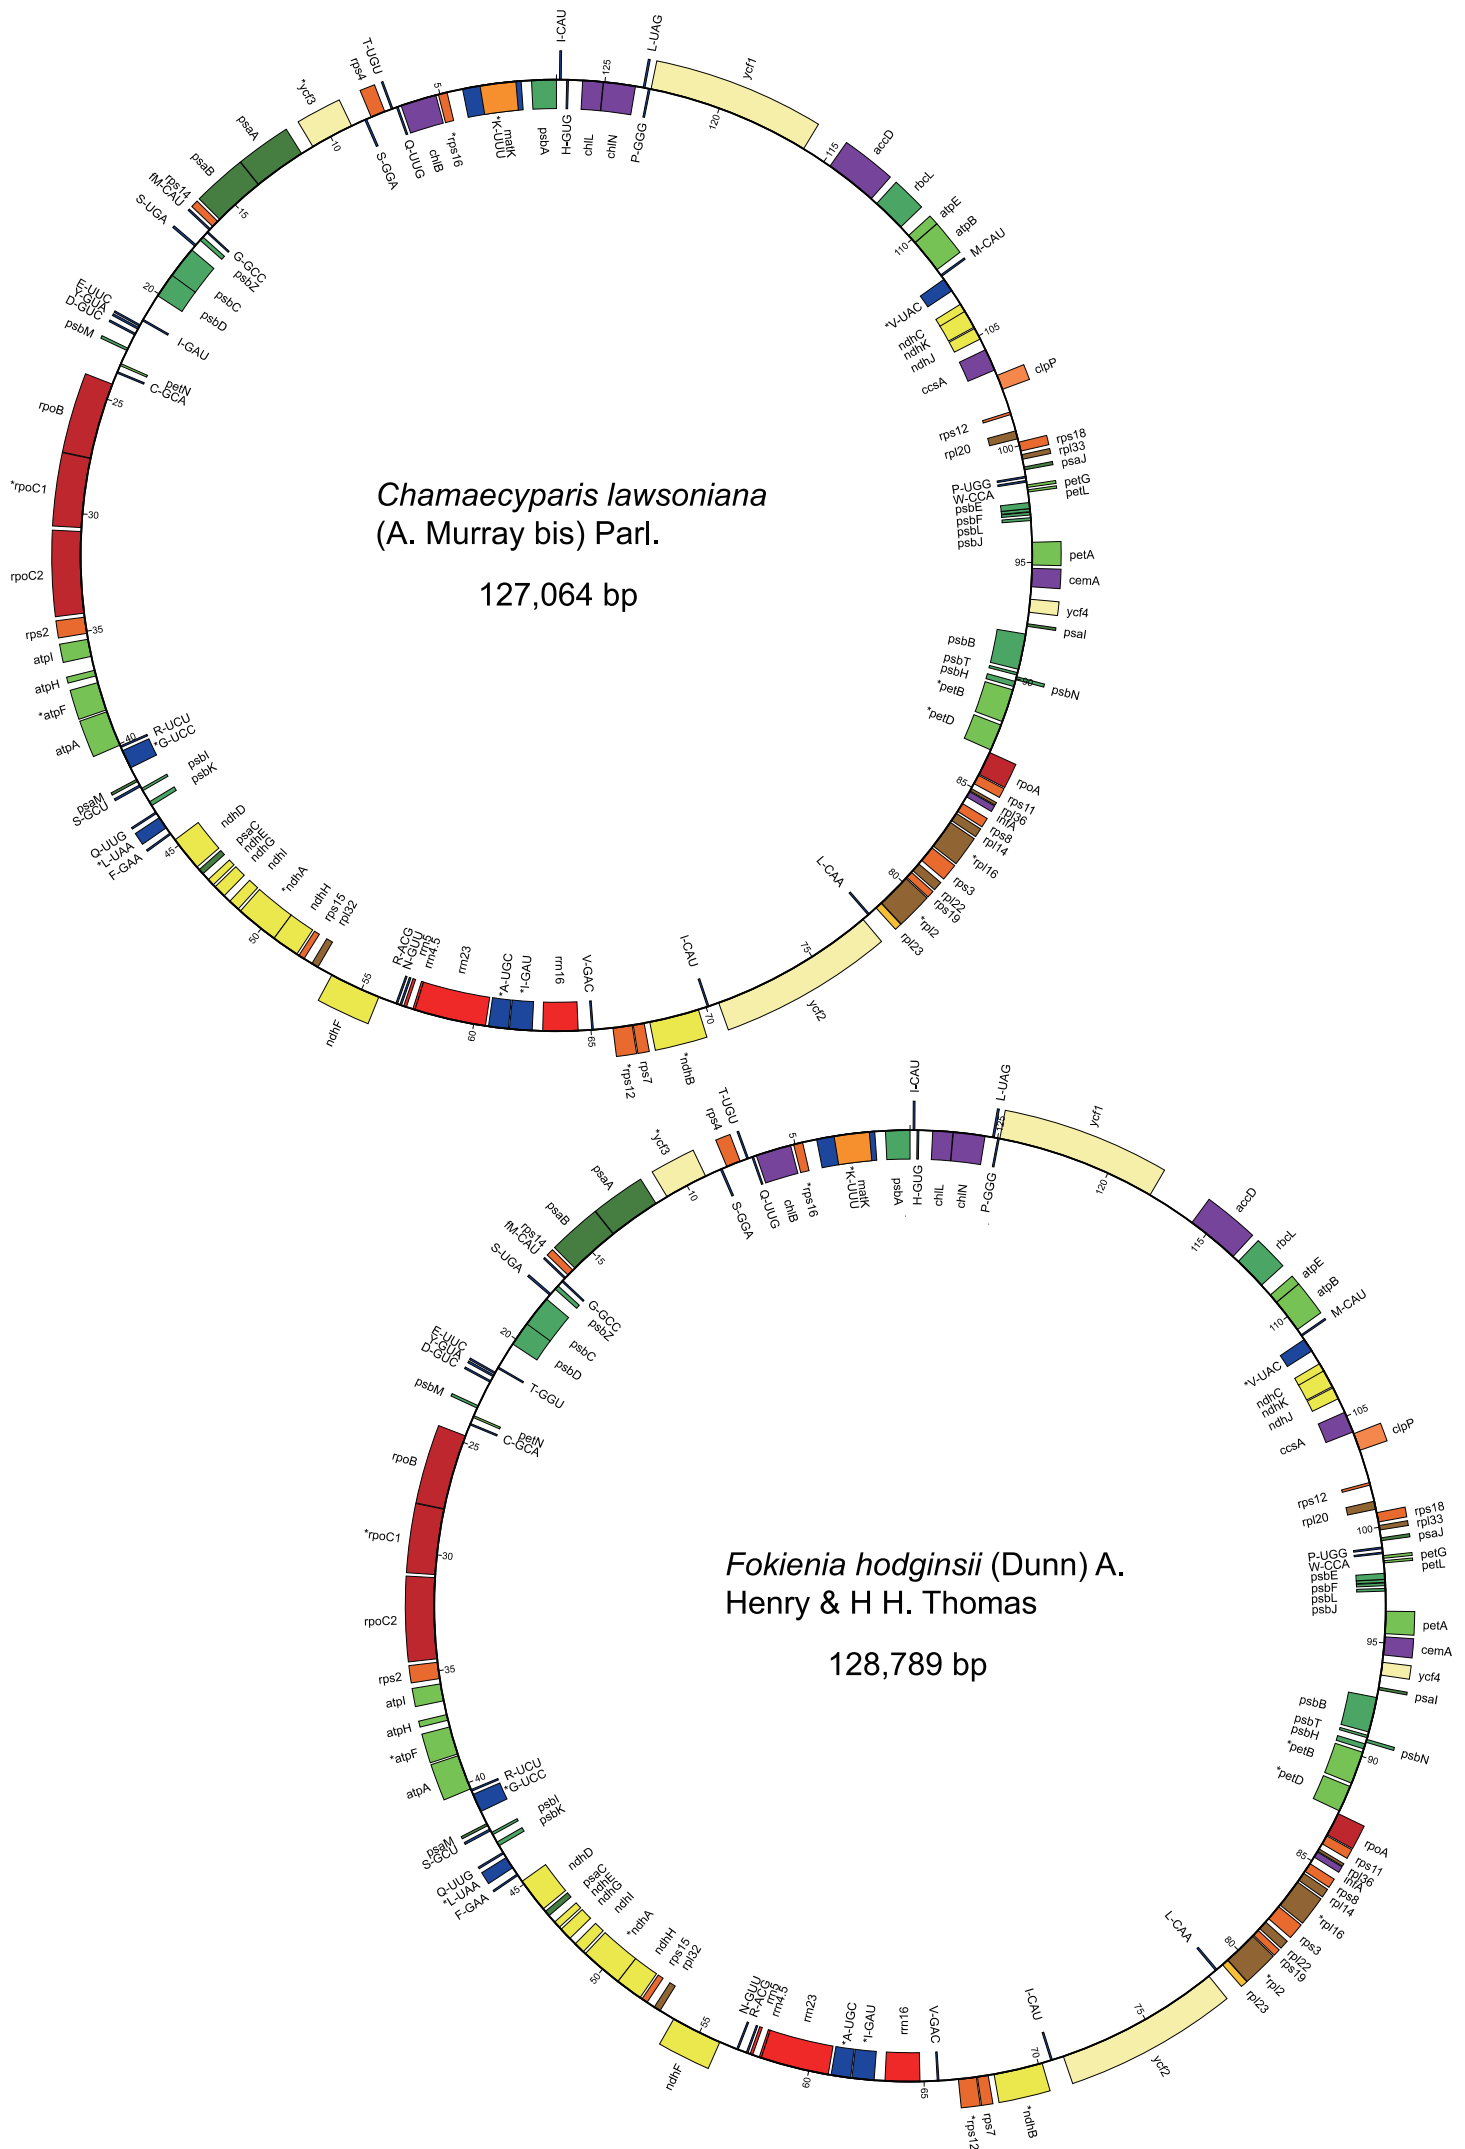

*Fokienia hodginsii* (Dunn) A.  
Henry & H H. Thomas

128,789 bp

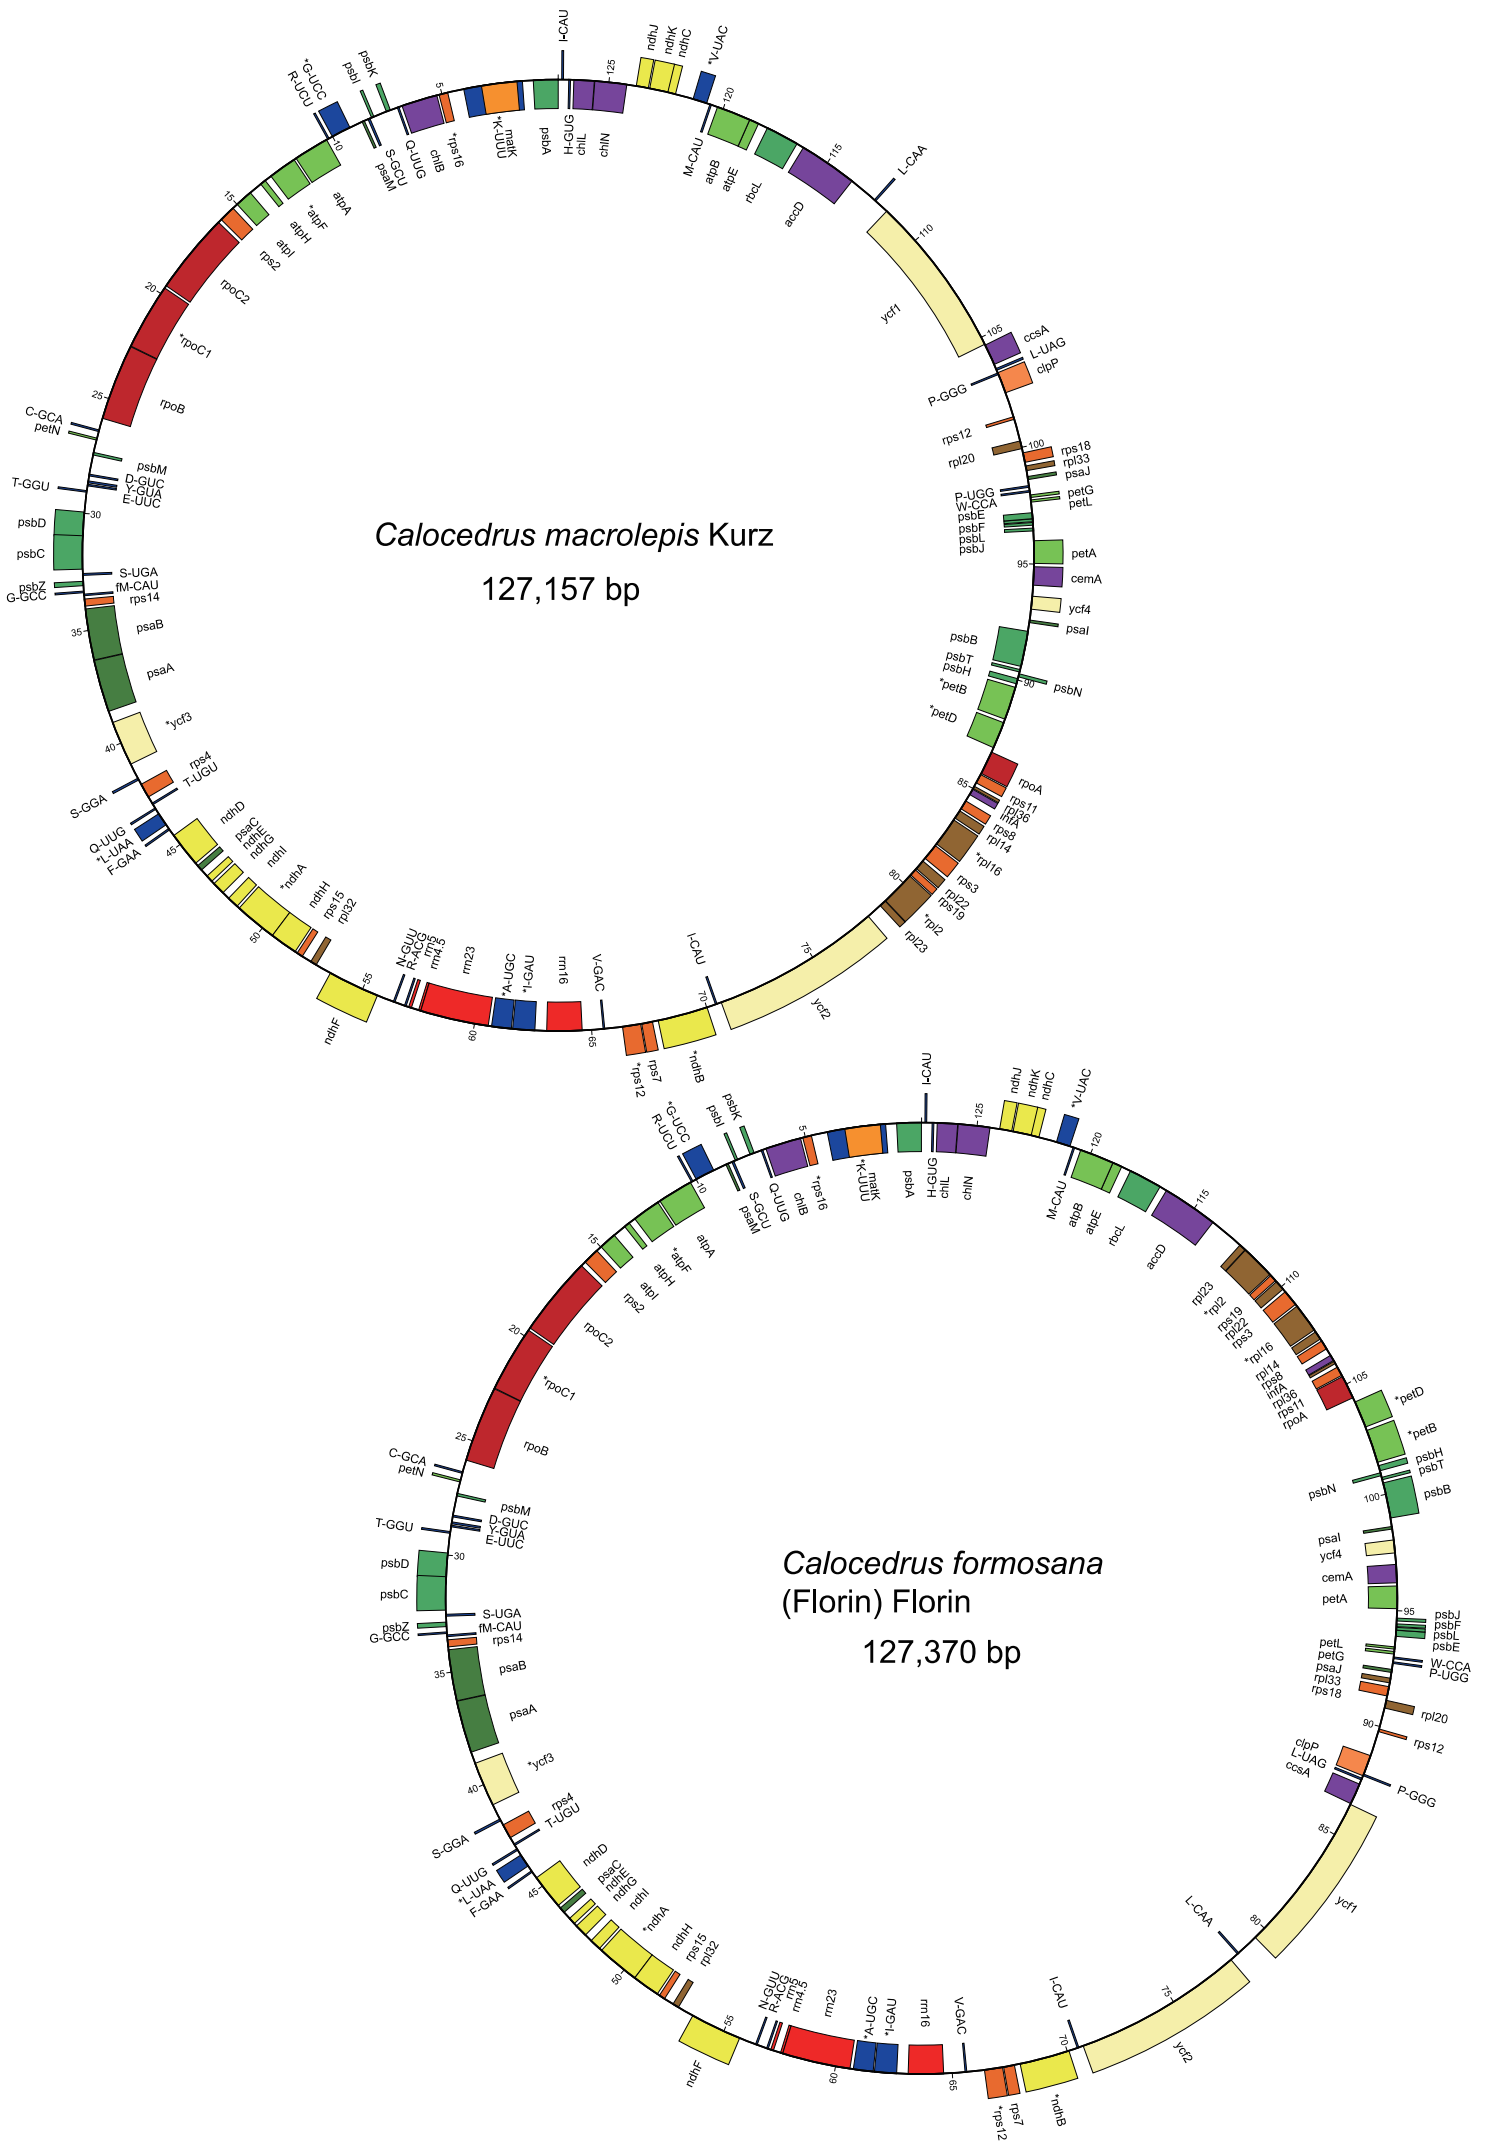

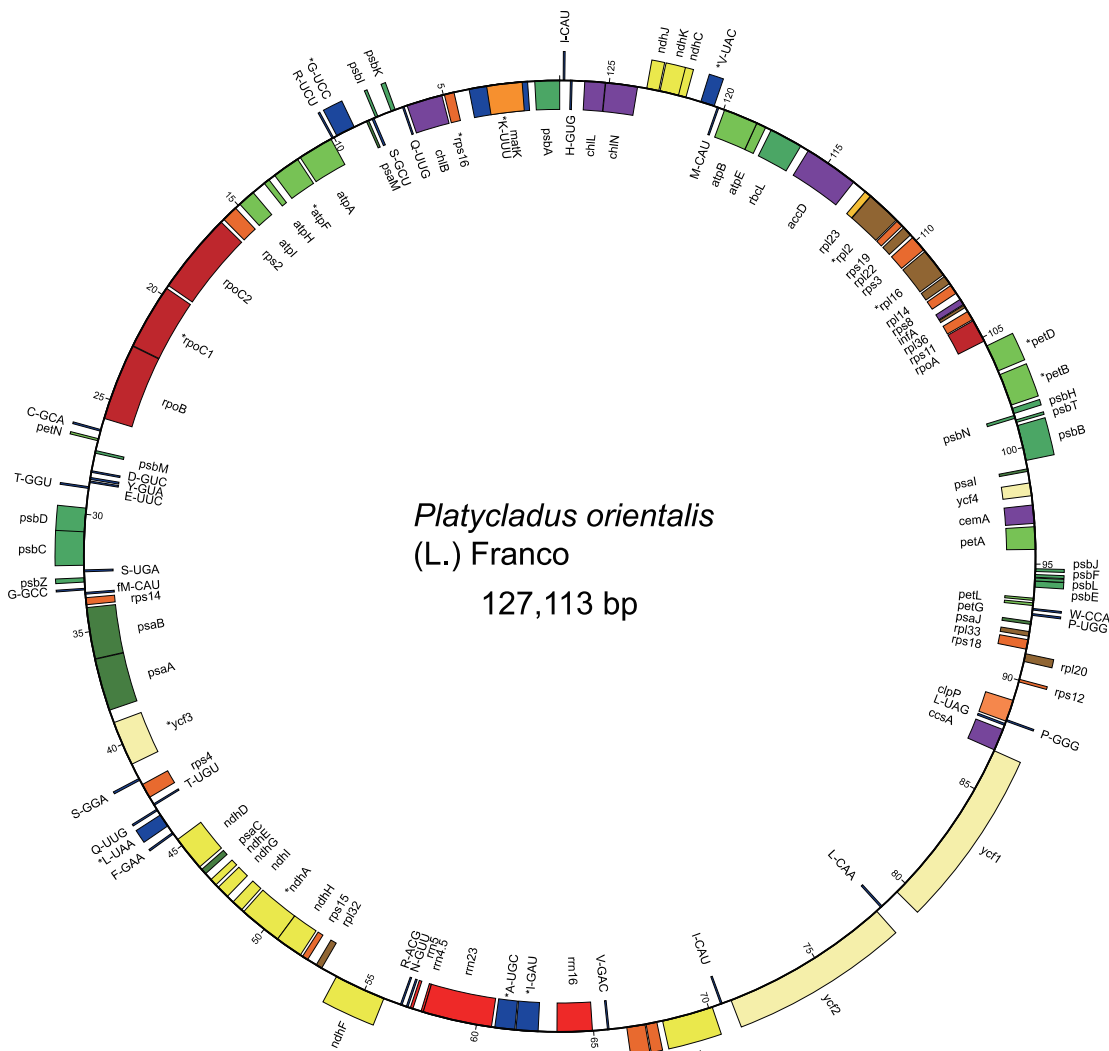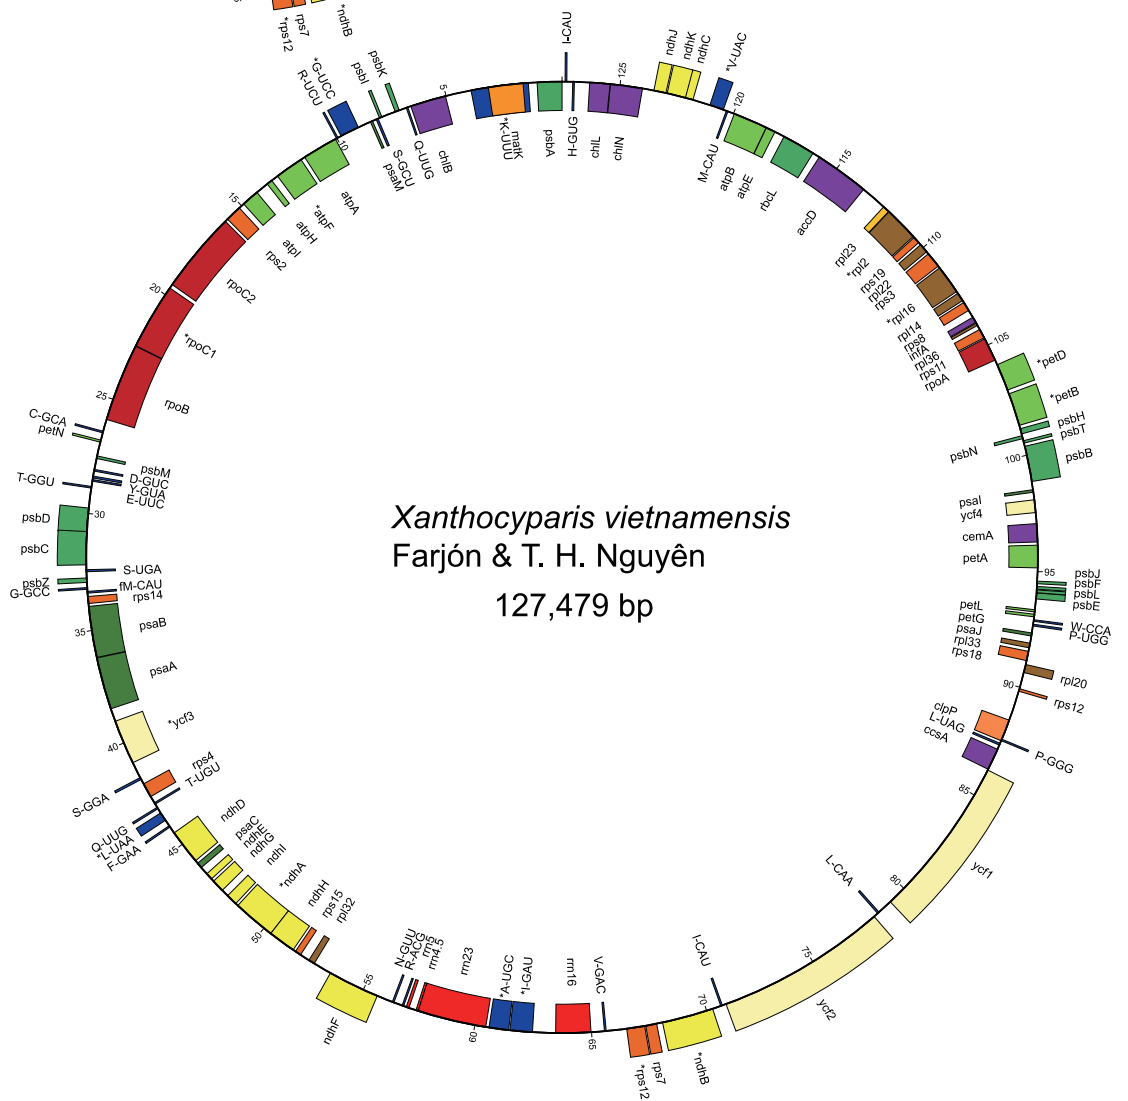



Figure S2

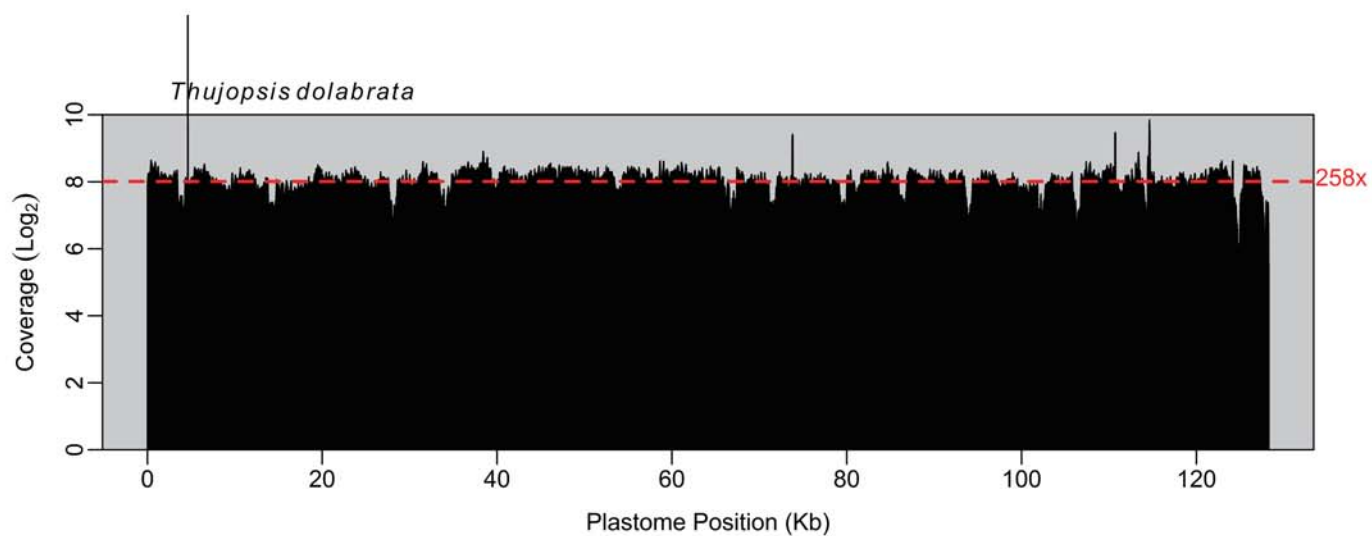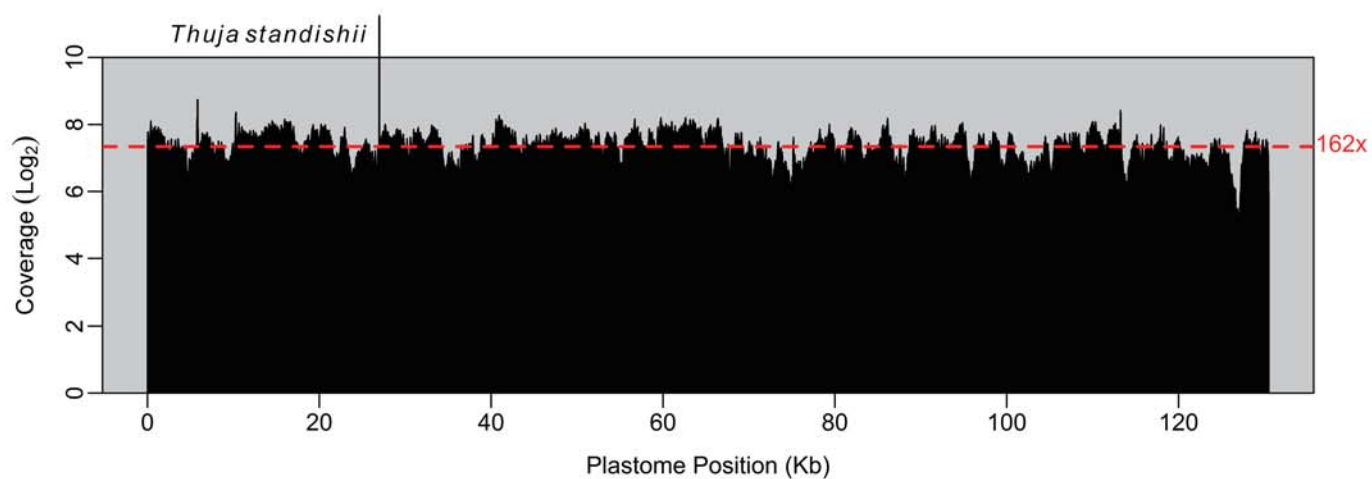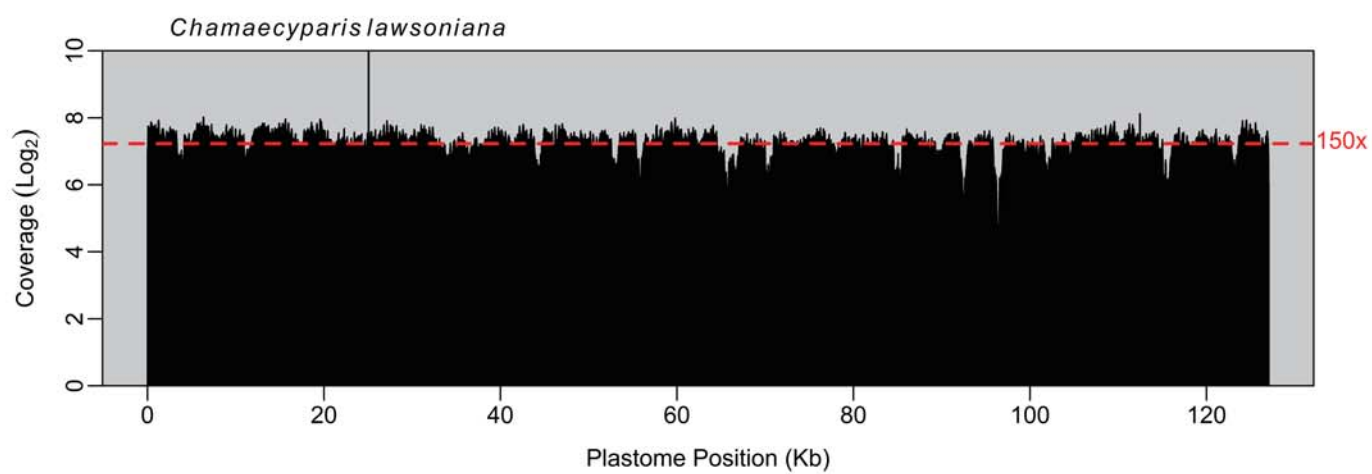

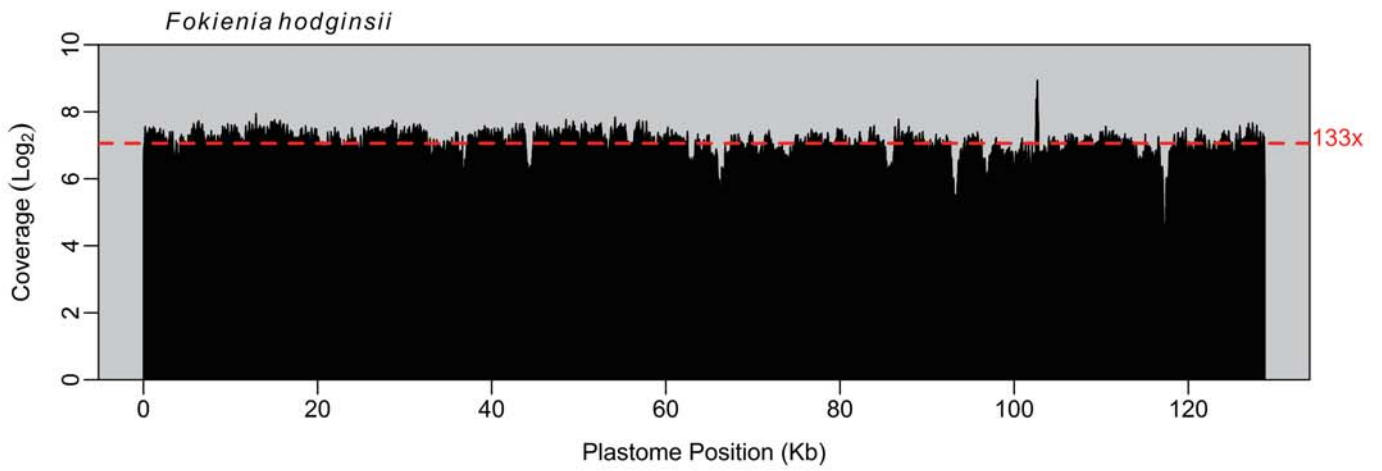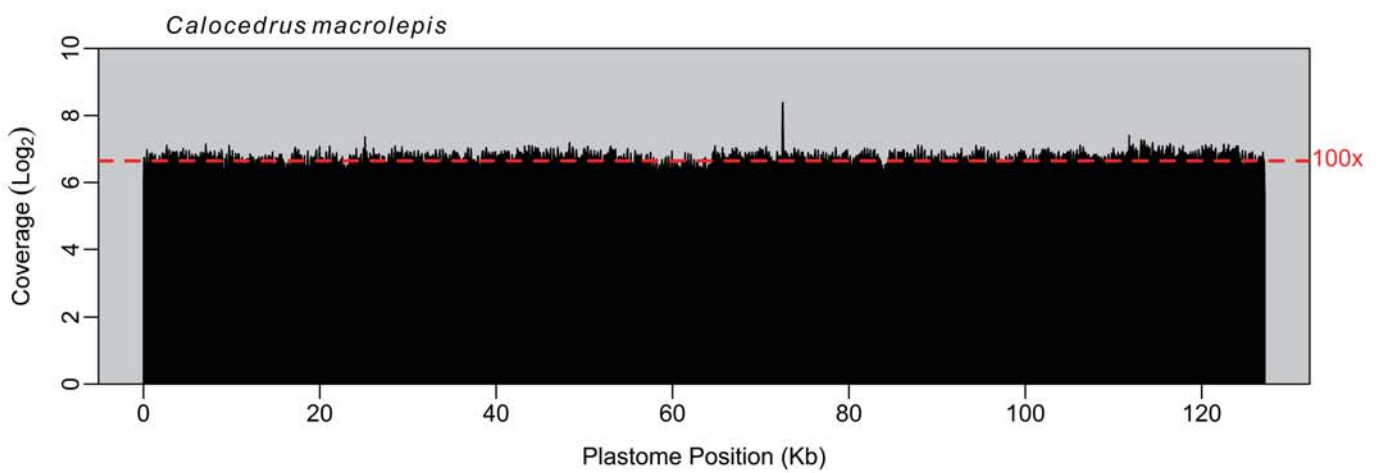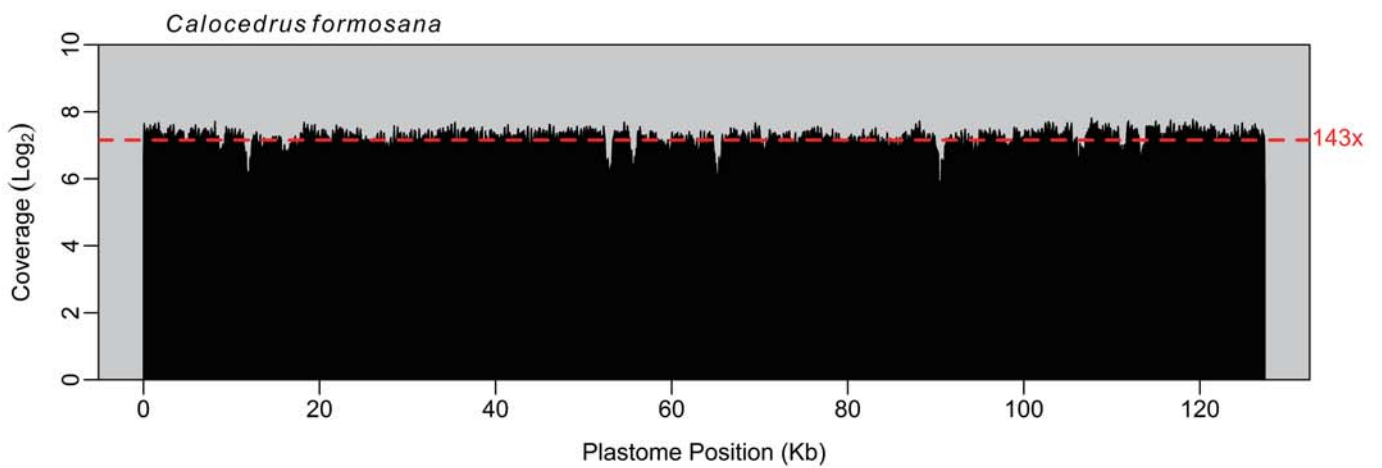

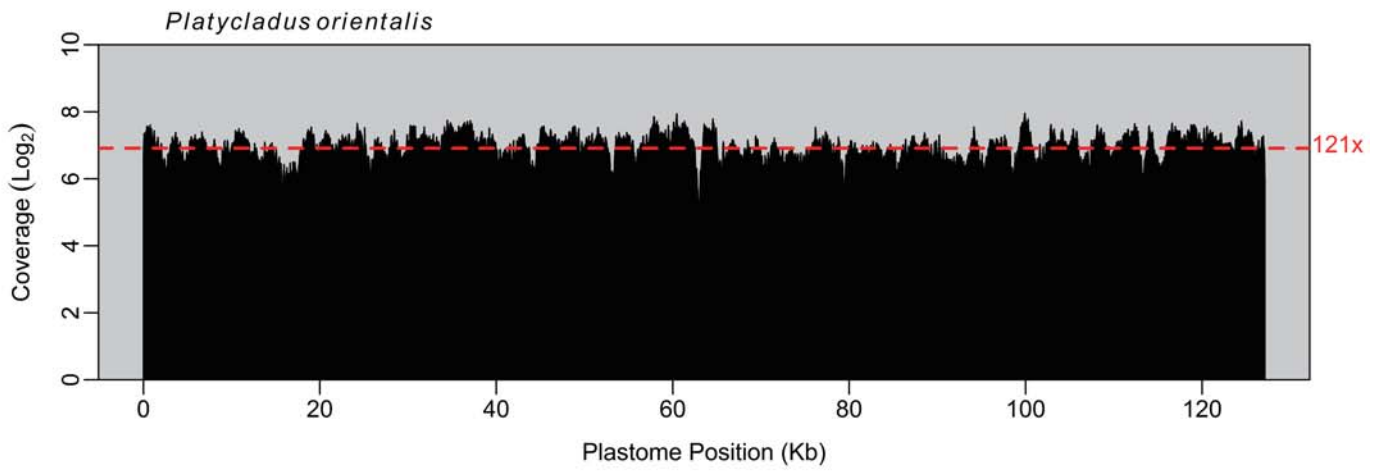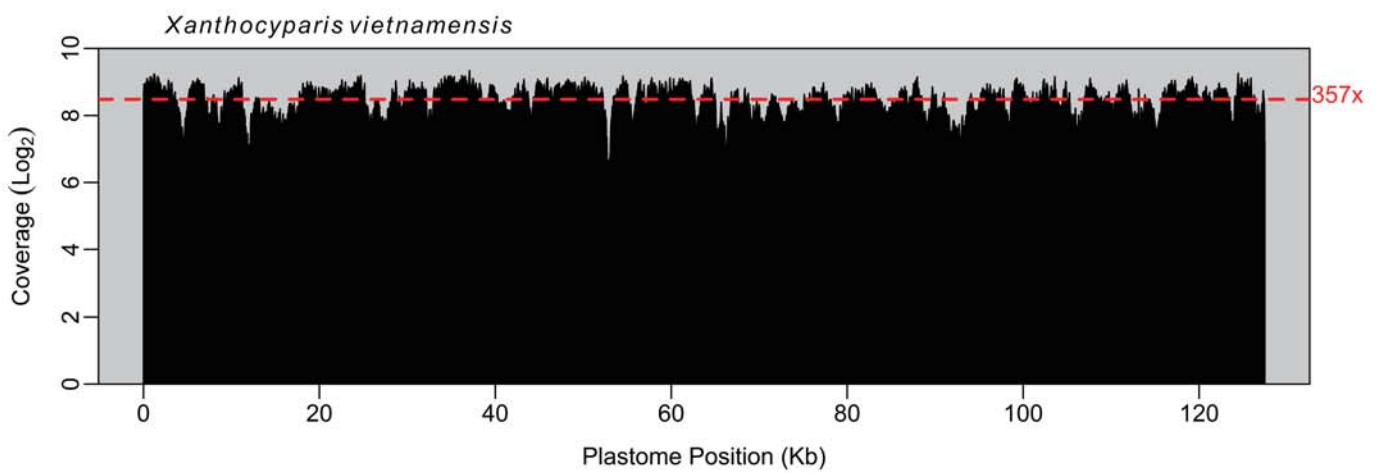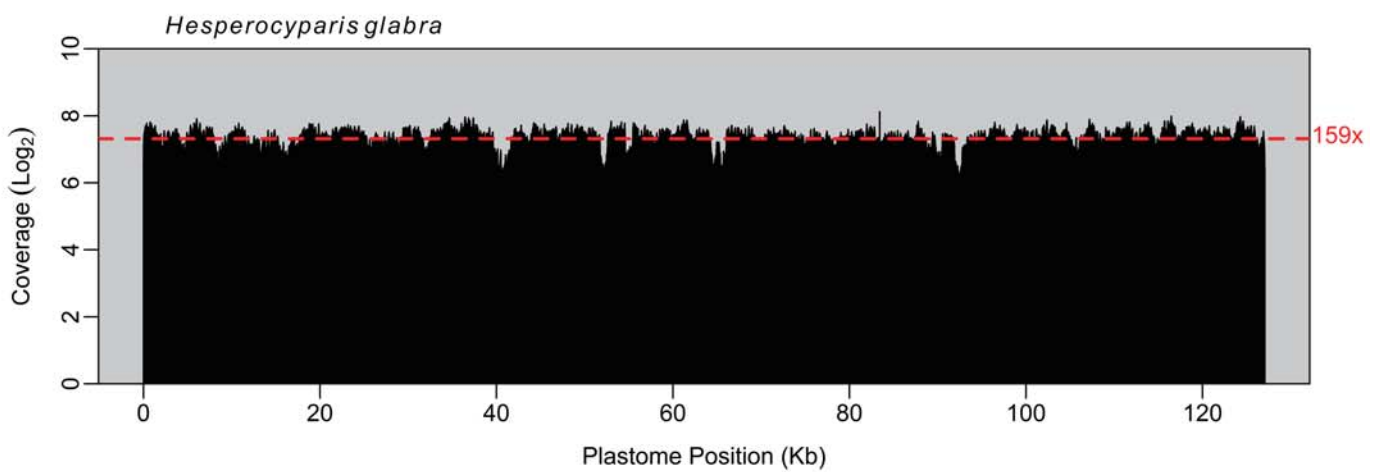



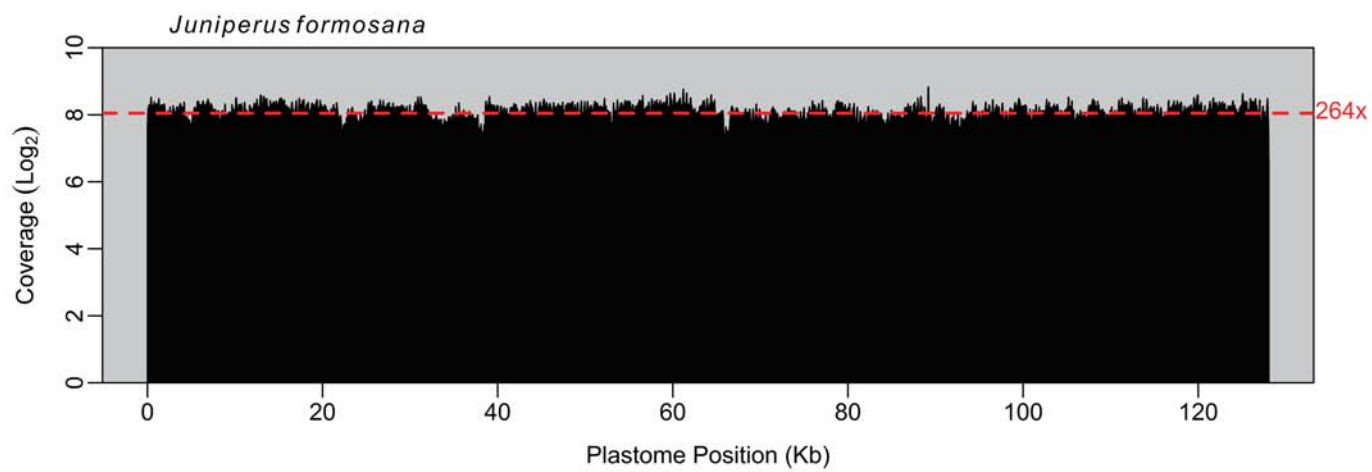

Figure S3

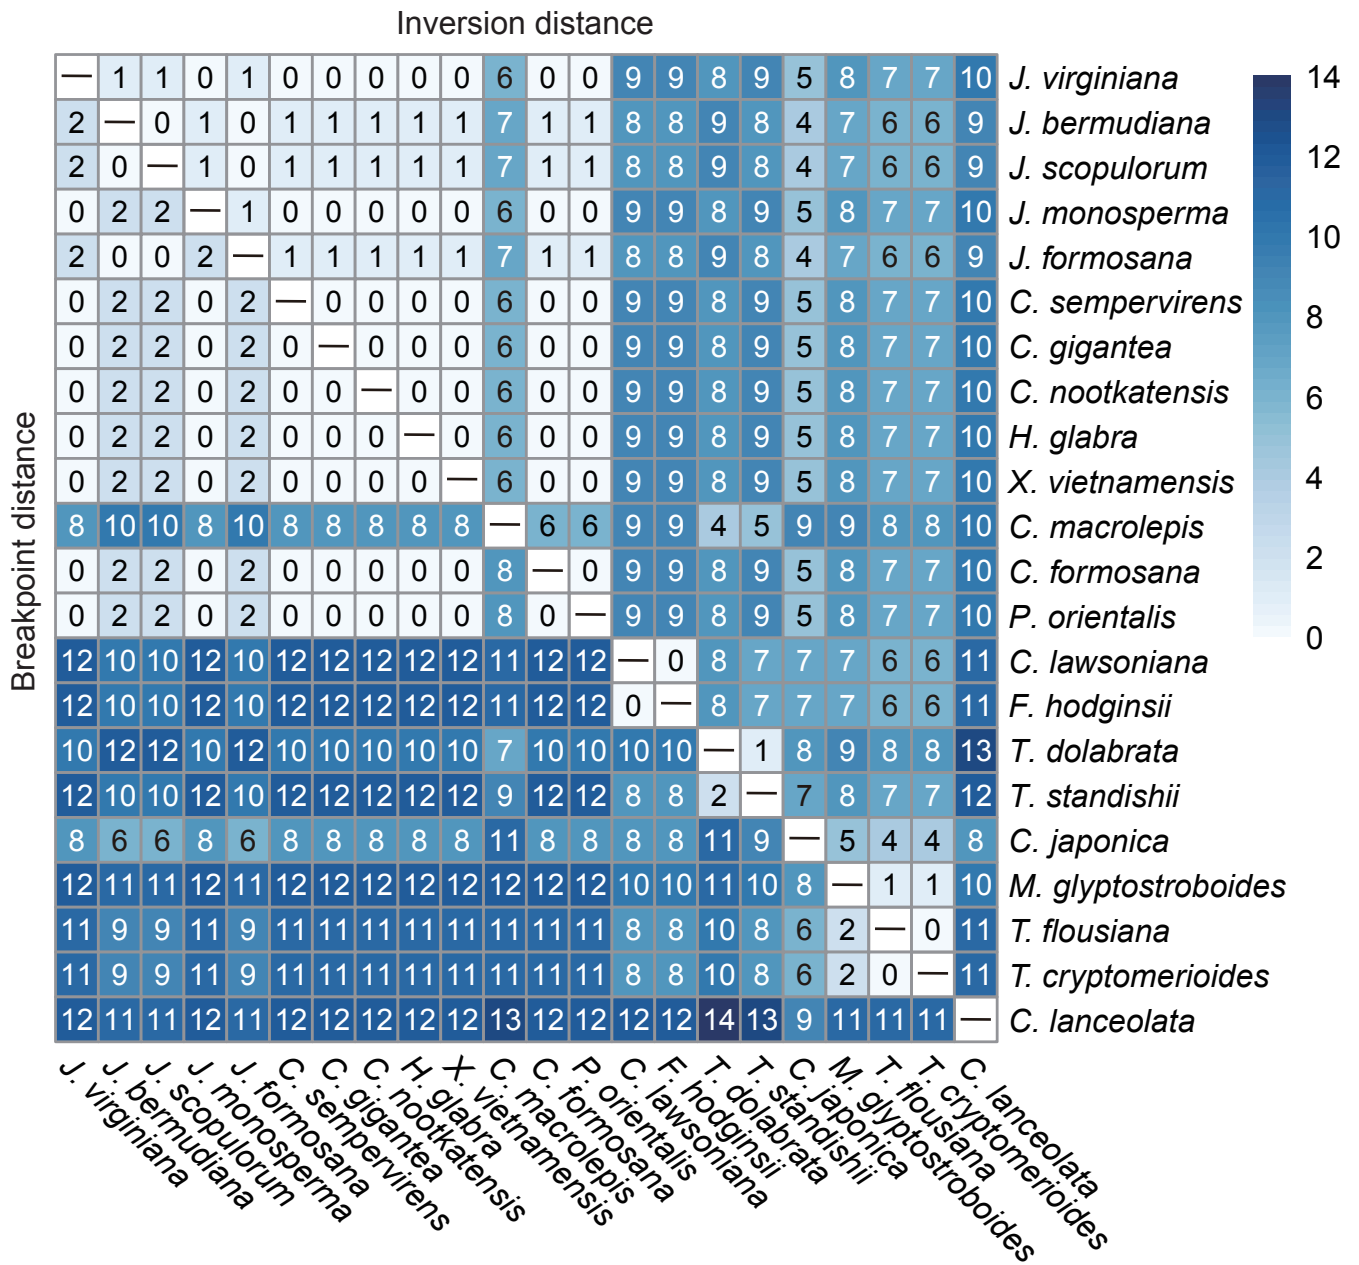

Figure S4

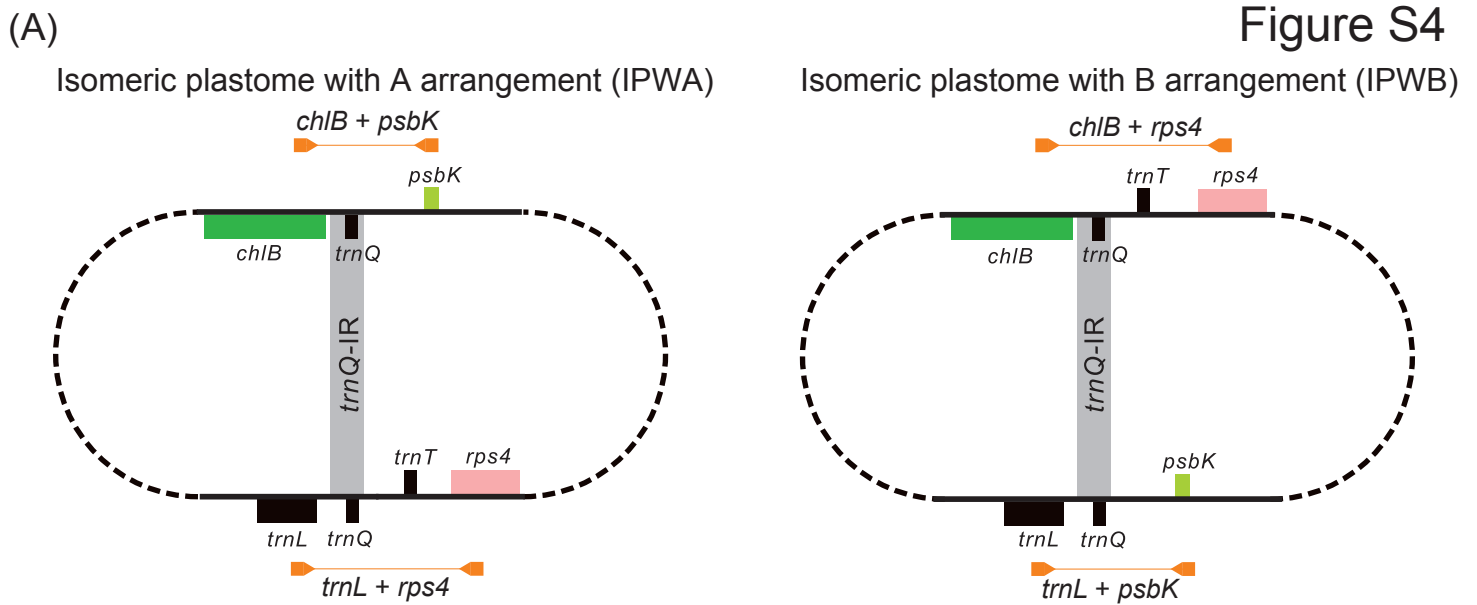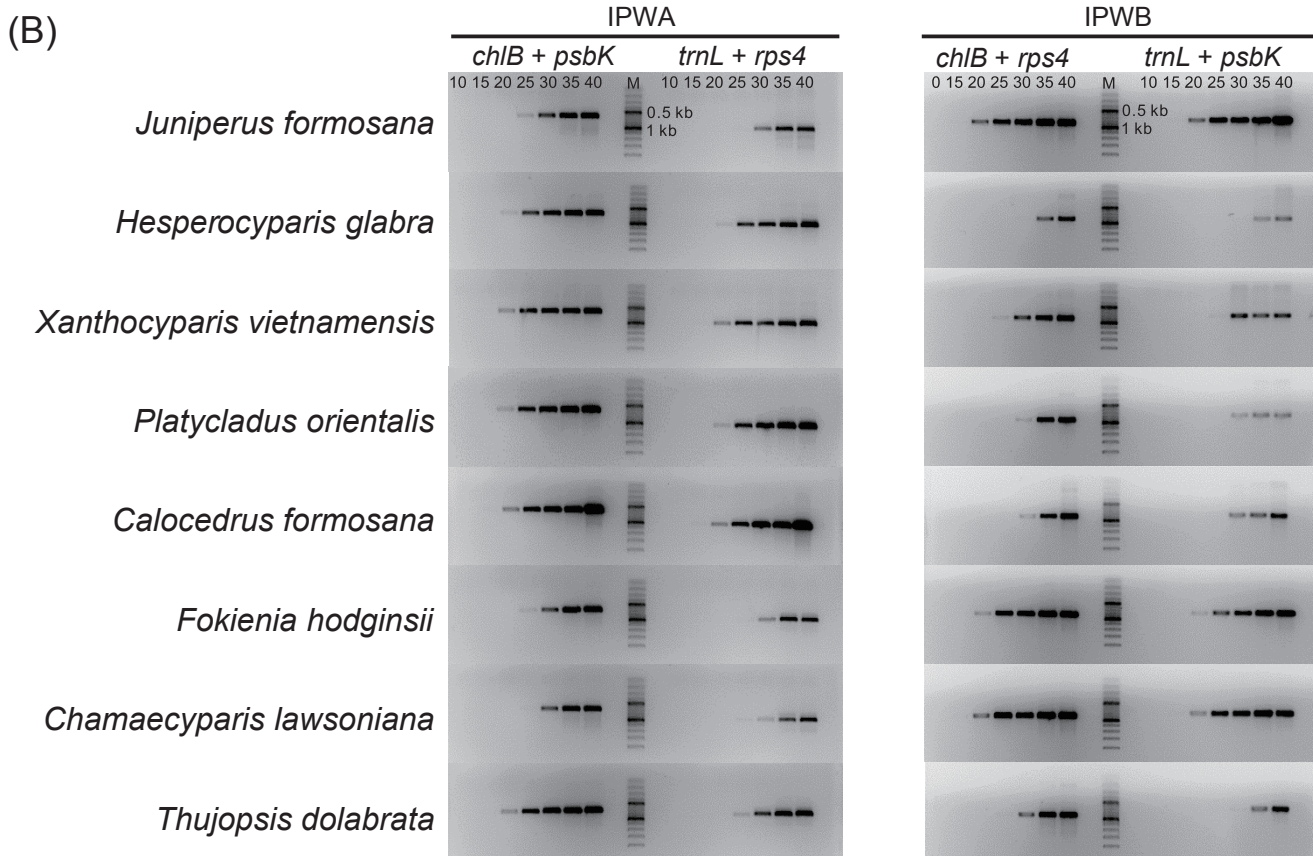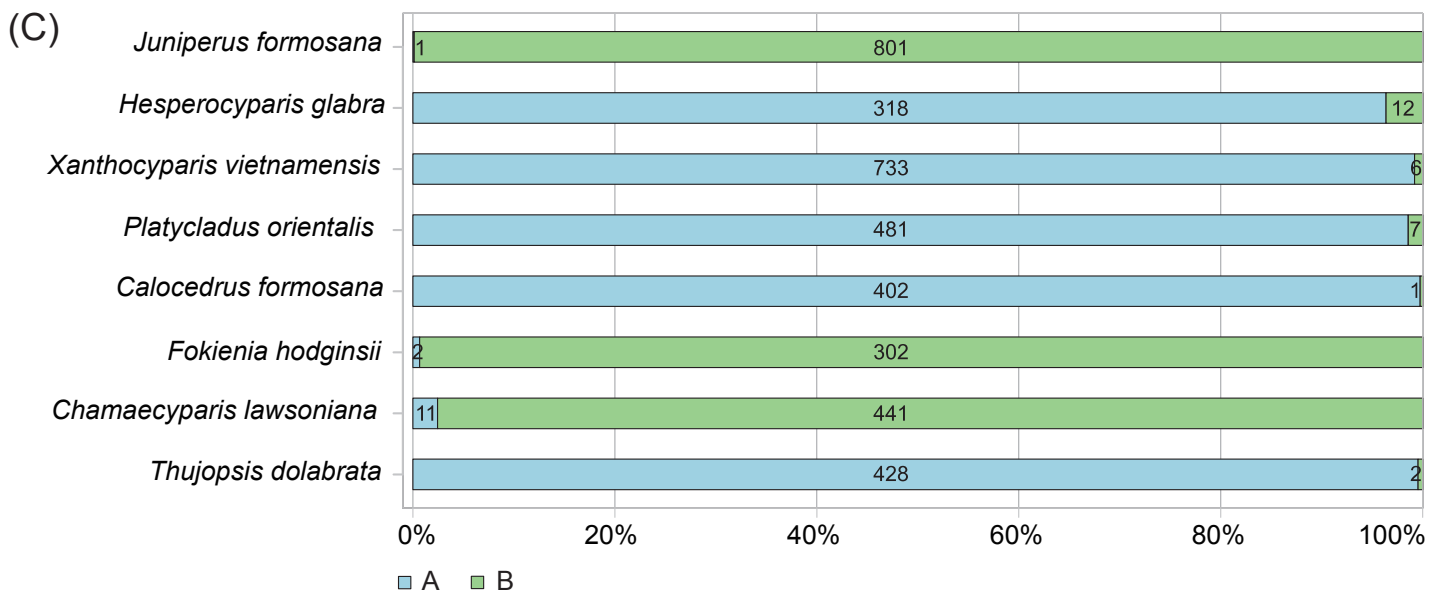

Figure S5

(A)

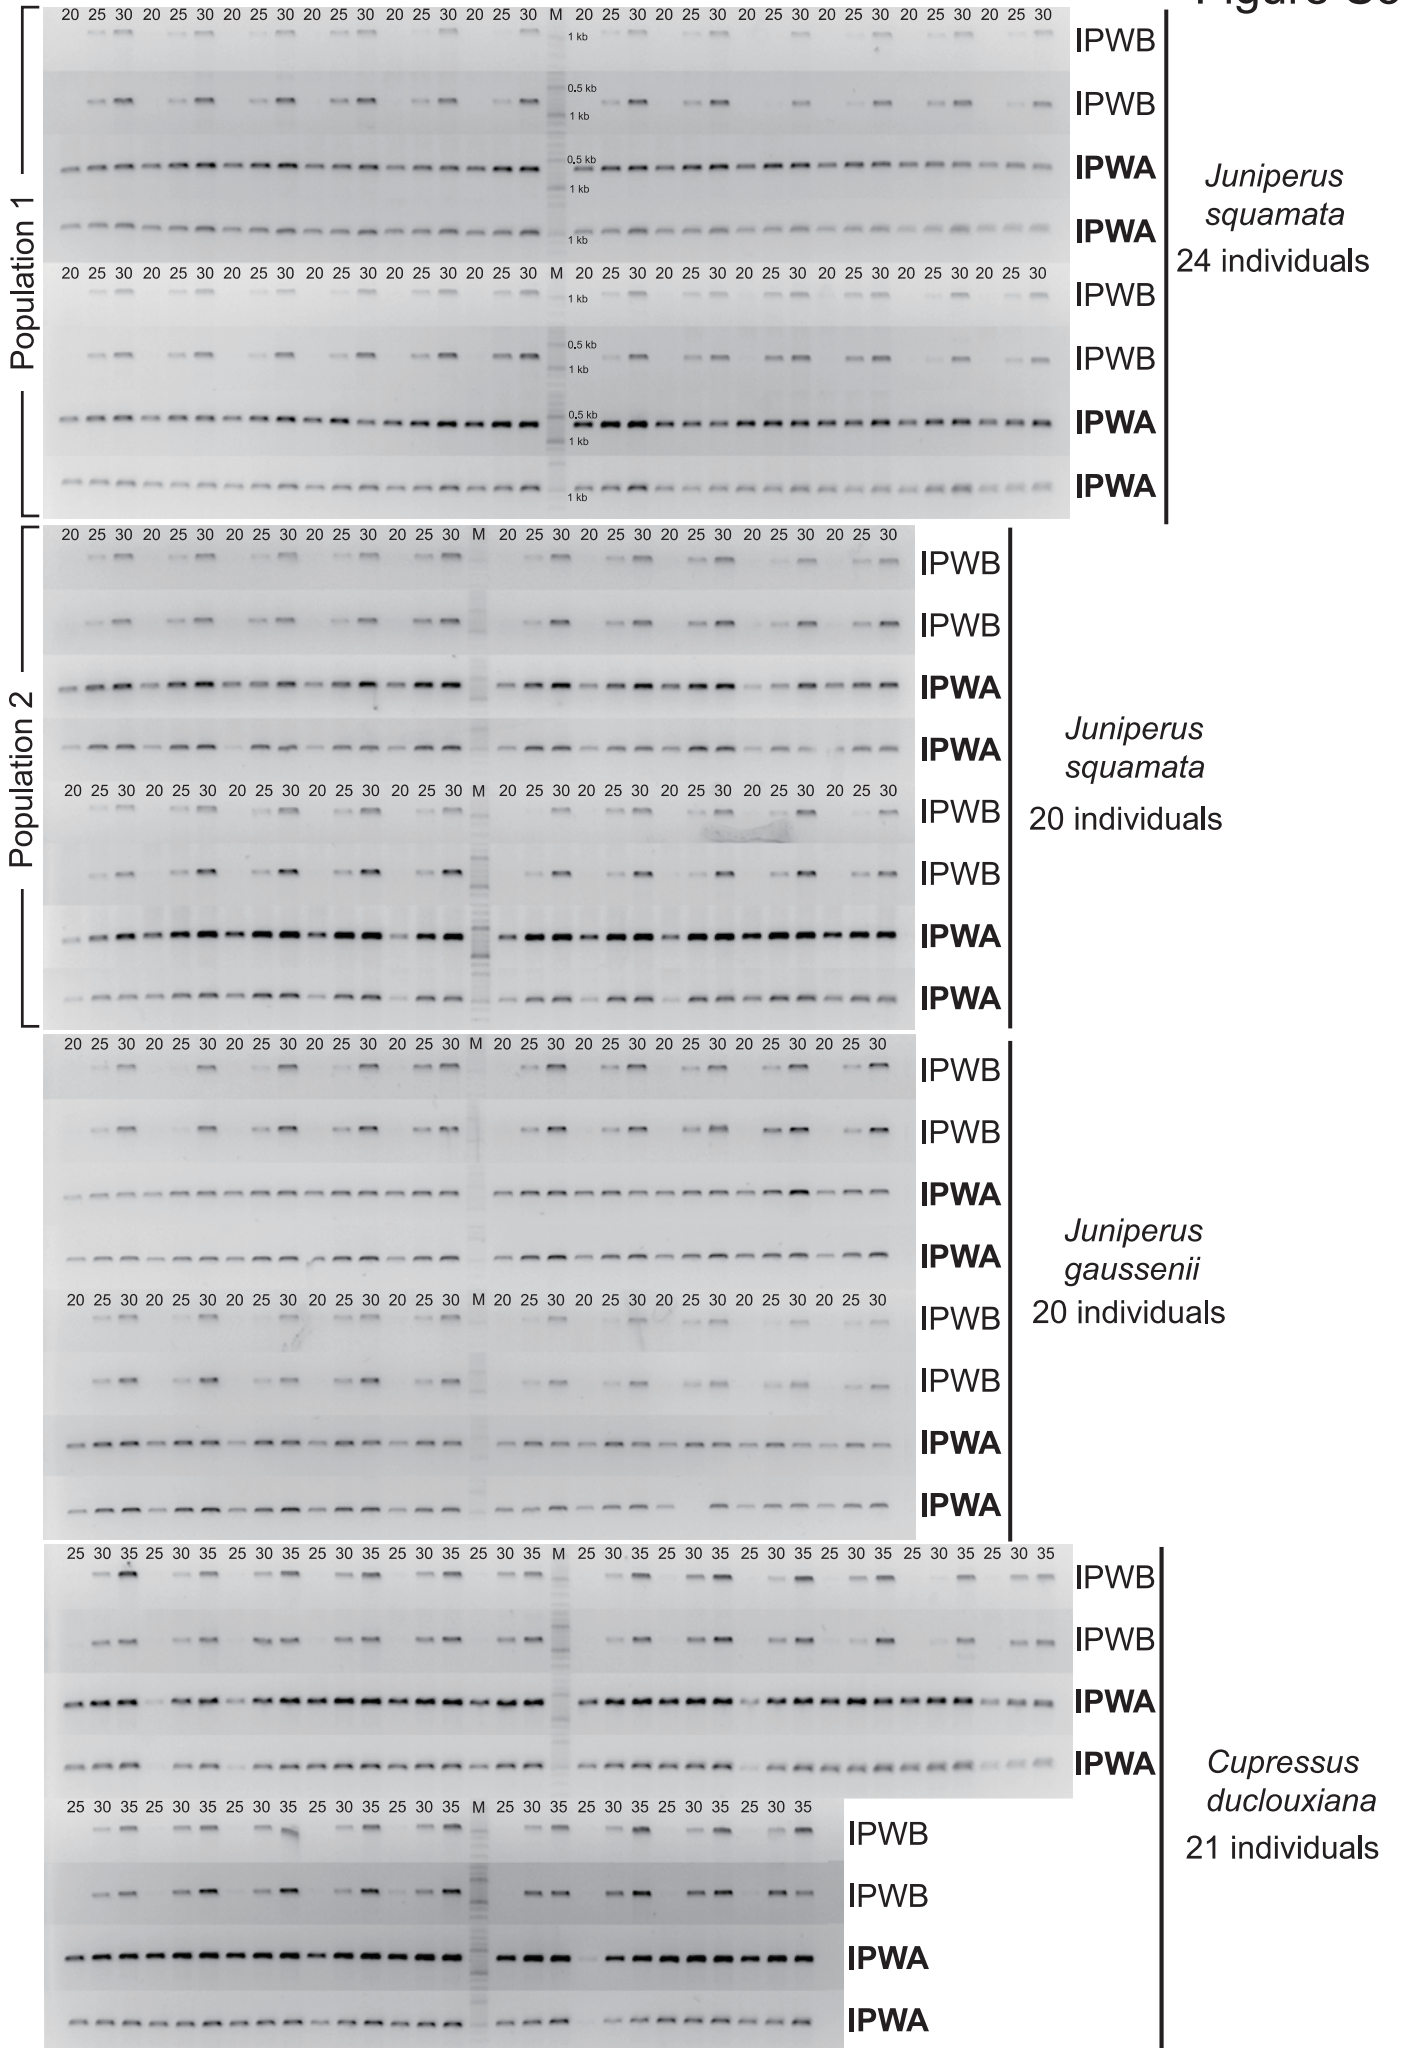



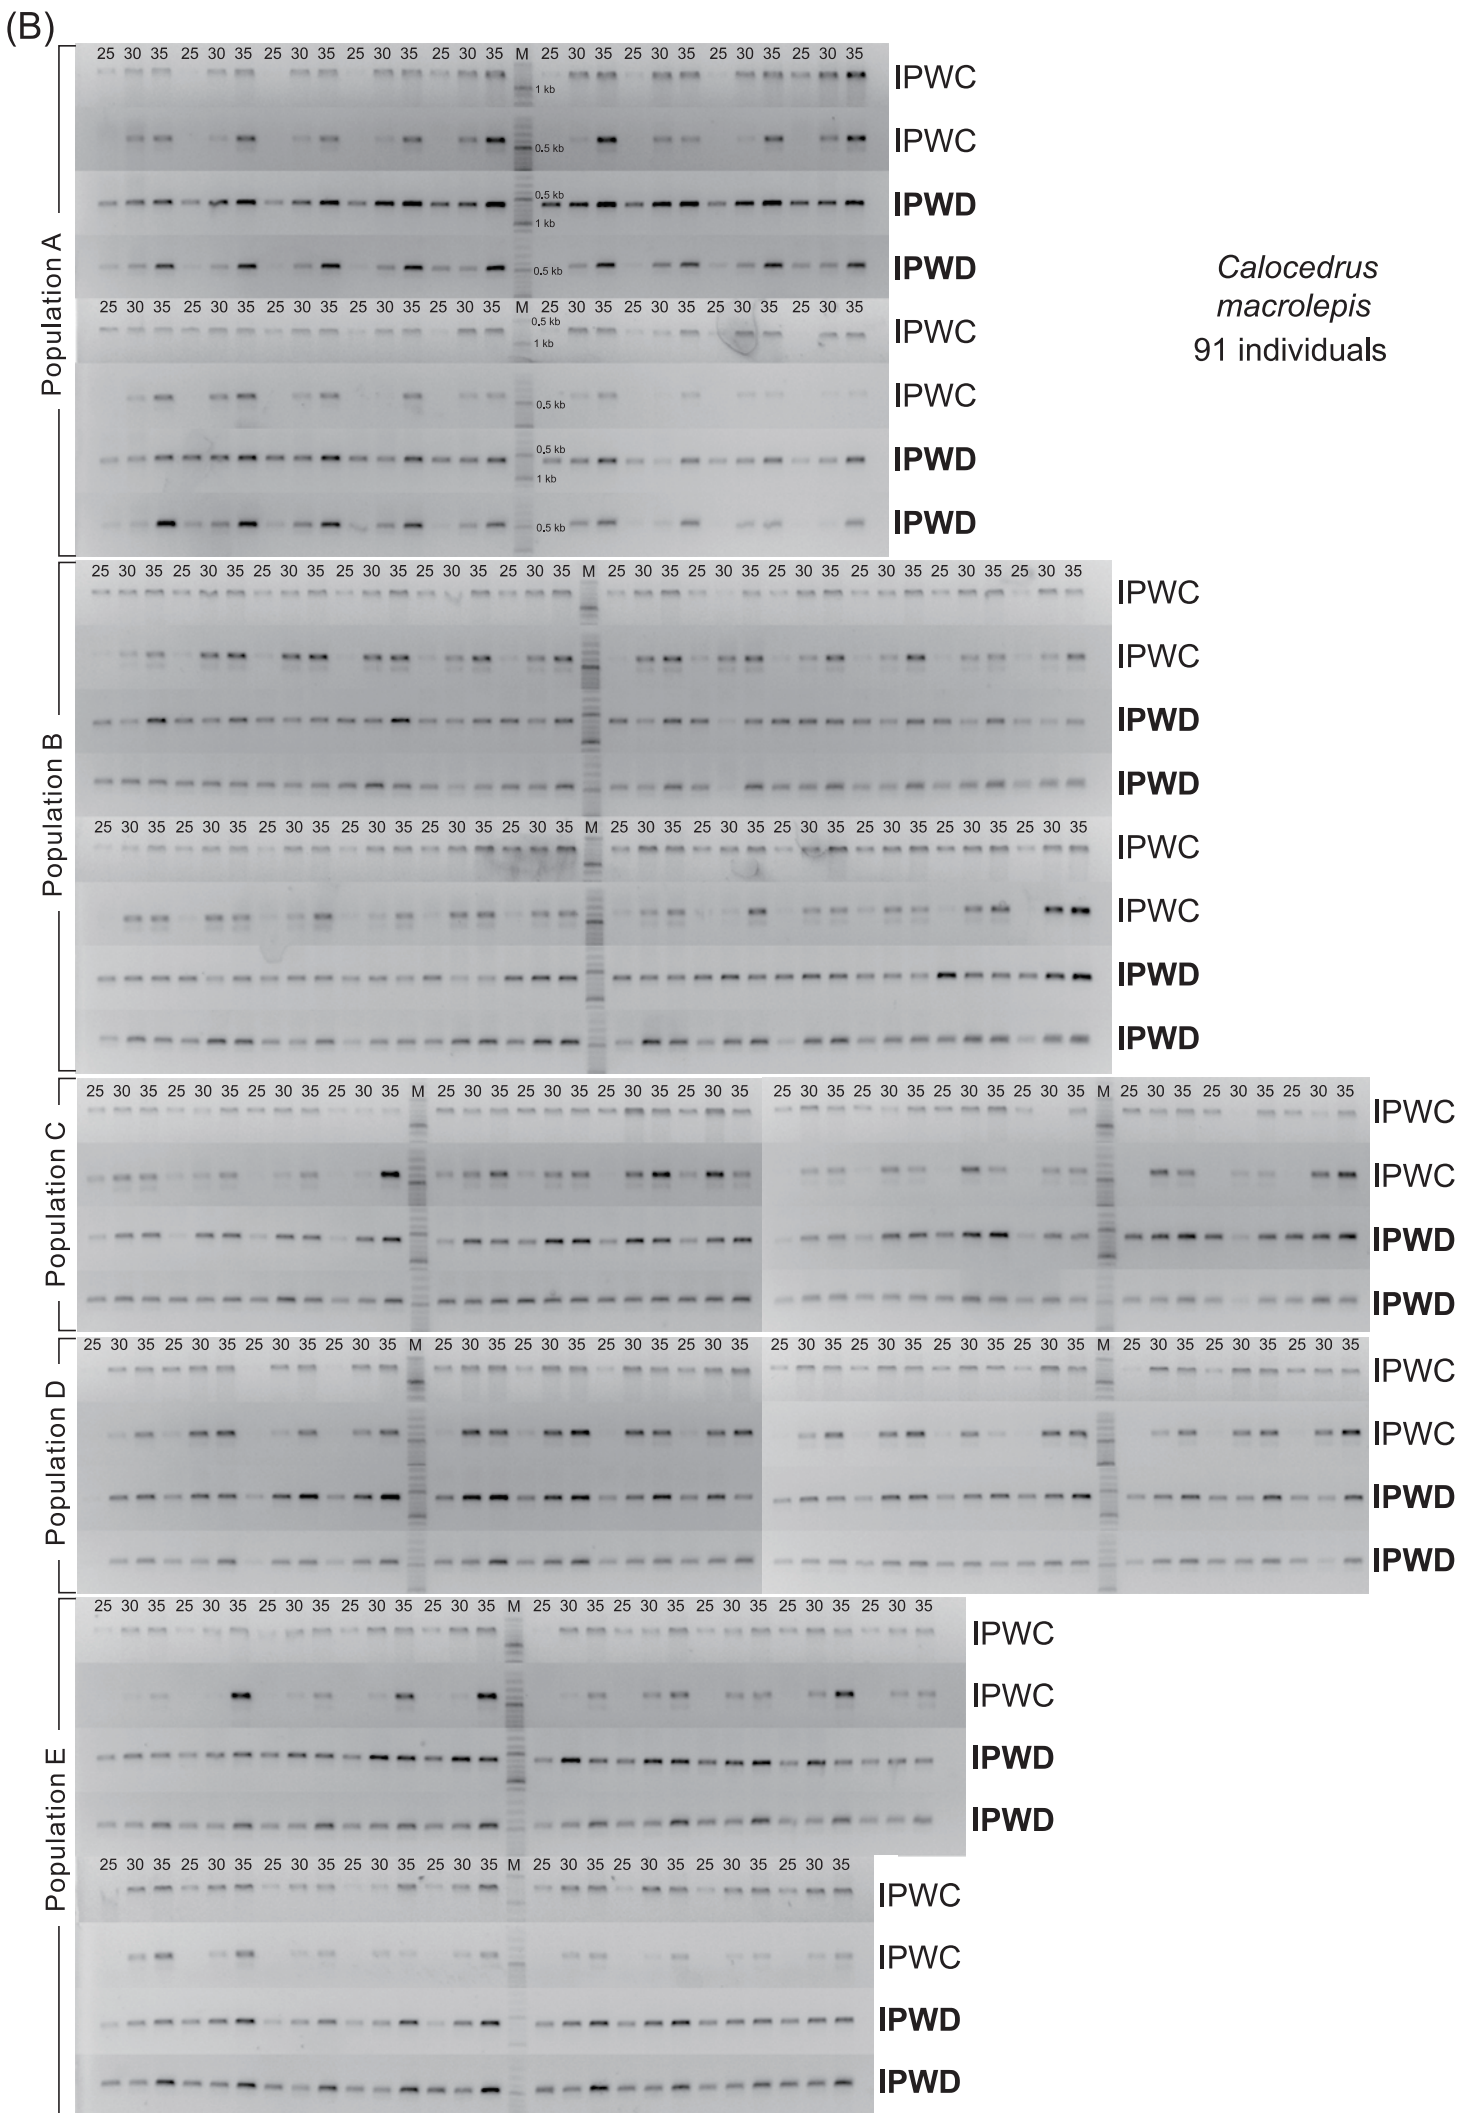

(C)

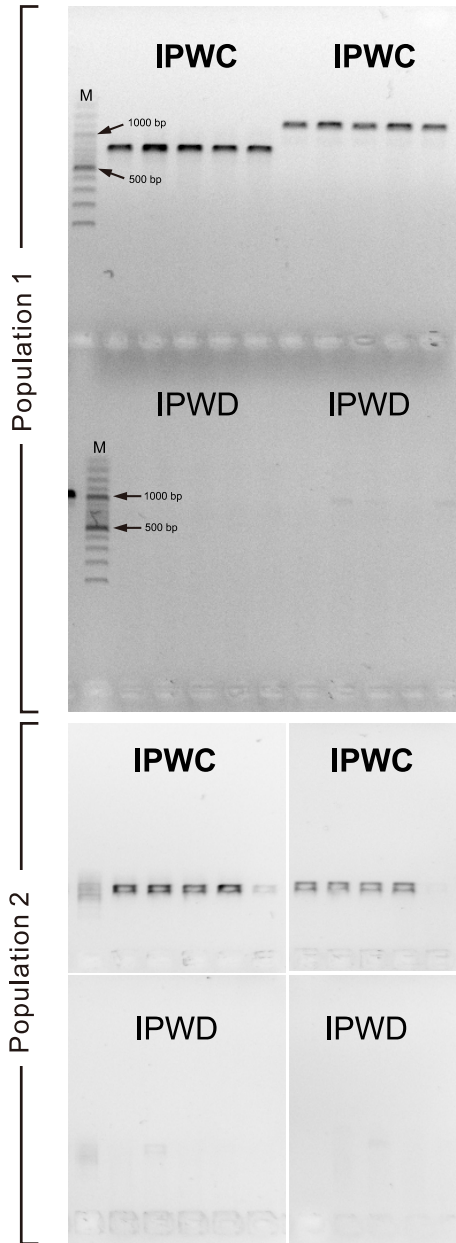

*Calocedrus formosana*  
10 individuals

Table S1. Collection information for plant materials

| Species                           | Collection locality                      | No. of individuals | Collection no. |
|-----------------------------------|------------------------------------------|--------------------|----------------|
| <i>Calocedrus formosana</i>       | Hsinchu County, Taiwan                   | 1                  | Yi16045        |
|                                   | Taichung Heping District, Taiwan         | 5                  | Yi16230        |
|                                   | Hsinchu County, Taiwan                   | 5                  | Yi16231        |
| <i>Calocedrus macrolepis</i>      | Kunming Botanic Garden, Yunnan, China    | 1                  | Yi16046        |
|                                   | Yuanjiang county, Yunnan, China          | 18                 | Yi12379 (1-18) |
|                                   | Bawangling Nature Reserve, Hainan, China | 19                 | Yi16047 (1-19) |
|                                   | Mojiang county, Yunnan, China            | 24                 | Yi16048 (1-24) |
|                                   | Rongjiang county, Guizhou, China         | 15                 | Yi13652 (1-15) |
|                                   | Rongjiang county, Guizhou, China         | 15                 | Yi16049 (1-15) |
|                                   | Kunming Botanic Garden, Yunnan, China    | 1                  | Yi16050        |
| <i>Chamaecyparis lawsoniana</i>   | Kunming Botanic Garden, Yunnan, China    | 1                  | Yi16050        |
| <i>Cupressus duclouxiana</i>      | Changchong Mountain, Yunnan, China       | 21                 | Yi16051 (1-21) |
| <i>Fokienia hodginsii</i>         | Kunming Botanic Garden, Yunnan, China    | 1                  | Yi16052        |
| <i>Hesperocyparis glabra</i>      | Kunming Botanic Garden, Yunnan, China    | 1                  | Yi16053        |
| <i>Juniperus formosana</i>        | Kunming Botanic Garden, Yunnan, China    | 1                  | Yi16054        |
| <i>Juniperus gaussenii</i>        | Luquan county, Yunnan, China             | 20                 | Yi16055 (1-20) |
| <i>Juniperus squamata</i>         | Luquan county, Yunnan, China             | 24                 | Yi16056 (1-24) |
|                                   | Luquan county, Yunnan, China             | 20                 | Yi16057 (1-20) |
|                                   | Kunming Botanic Garden, Yunnan, China    | 1                  | Yi16058        |
| <i>Platycladus orientalis</i>     | Kunming Botanic Garden, Yunnan, China    | 1                  | Yi16058        |
| <i>Thuja standishii</i>           | Kunming Botanic Garden, Yunnan, China    | 1                  | Yi16059        |
| <i>Thujopsis dolabrata</i>        | Kunming Botanic Garden, Yunnan, China    | 1                  | Yi16060        |
| <i>Xanthocyparis vietnamensis</i> | Kunming Botanic Garden, Yunnan, China    | 1                  | Yi16061        |

Table S2. Taxa sampled in this study

| Subfamily         | Species                                                          | Accession no. |
|-------------------|------------------------------------------------------------------|---------------|
| Cupressoideae     | <i>Callitropsis nootkatensis</i> (D. Don) Oerst. Ex D. P. Little | NC_026295     |
|                   | <i>Calocedrus formosana</i> (Florin) Florin                      | KX832620      |
|                   | <i>Calocedrus macrolepis</i> Kurz                                | KX832621      |
|                   | <i>Chamaecyparis lawsoniana</i> (A. Murray bis) Parl.            | KX832622      |
|                   | <i>Cupressus gigantea</i> W.C.Cheng & L.K.Fu                     | NC_028155     |
|                   | <i>Cupressus sempervirens</i> L.                                 | NC_026296     |
|                   | <i>Fokienia hodginsii</i> (Dunn) A. Henry & H H. Thomas          | KX832623      |
|                   | <i>Hesperocyparis glabra</i> (Sudw.) Bartel                      | KX832624      |
|                   | <i>Juniperus bermudiana</i> L.                                   | NC_024021     |
|                   | <i>Juniperus formosana</i> Hayata                                | KX832625      |
|                   | <i>Juniperus monosperma</i> (Engelm.) Sarg.                      | NC_024022     |
|                   | <i>Juniperus scopulorum</i> Sarg.                                | NC_024023     |
|                   | <i>Juniperus virginiana</i> L.                                   | NC_024024     |
|                   | <i>Platycladus orientalis</i> (L.) Franco                        | KX832626      |
|                   | <i>Thuja standishii</i> (Gordon) Carrière                        | KX832627      |
|                   | <i>Thujopsis dolabrata</i> (L.f.) Siebold & Zucc.                | KX832628      |
|                   | <i>Xanthocyparis vietnamensis</i> Farjón & T. H. Nguyen          | KX832629      |
| Cunninghamioideae | <i>Cunninghamia lanceolata</i> (Lamb.) Hook                      | NC_021437     |
| Sequoioideae      | <i>Metasequoia glyptostroboides</i> Hu & W. C. Cheng             | NC_027423     |
| Taiwanoideae      | <i>Taiwania cryptomerioides</i> Hayata                           | NC_016065     |
|                   | <i>Taiwania flousiana</i> Gaussen                                | NC_021441     |
| Taxodioideae      | <i>Cryptomeria japonica</i> (Thunb. Ex L. f.) D. Don             | NC_010548     |



Table S3. List of the 73 protein-coding genes applied in the phylogenetic reconstruction

| Gene groups | Gene function and number                                                                         | Genes                                                                                                                                                                                     |
|-------------|--------------------------------------------------------------------------------------------------|-------------------------------------------------------------------------------------------------------------------------------------------------------------------------------------------|
| I           | Gene expression (19)<br><i>rpl</i> -, <i>rpo</i> - and <i>rps</i> - genes                        | <i>rpl14, rpl16, rpl2, rpl20, rpl23, rpl33, rpl36, rpoA, rpoB, rpoC1, rps2, rps4, rps7, rps8, rps11, rps12, rps14, rps15, rps19</i>                                                       |
| II          | Photosynthetic apparatus (30)<br><i>pet</i> -, <i>psa</i> -, <i>psb</i> - and <i>ycf</i> - genes | <i>rbcL, petA, petB, petD, petG, petL, petN, psaA, psaB, psaC, psaI, psaJ, psaM, psbA, psbB, psbC, psbD, psbE, psbF, psbH, psbI, psbJ, psbK, psbL, psbM, psbN, psbT, psbZ, ycf3, ycf4</i> |
| III         | Photosynthetic metabolism (21)<br><i>atp</i> -, <i>ndh</i> - and <i>chl</i> - genes              | <i>atpA, atpB, atpE, atpF, atpH, atpI, ndhA, ndhB, ndhC, ndhD, ndhE, ndhF, ndhG, ndhH, ndhI, ndhJ, ndhK, infA, chlB, chlL, chlN</i>                                                       |
| IV          | Miscellaneous (3)                                                                                | <i>ccsA, cemA, matK</i>                                                                                                                                                                   |

Table S4. The permutation of number-coded locally collinear blocks (LCBs) for each plastome

| Species                             | LCBs                                     |
|-------------------------------------|------------------------------------------|
| <i>Juniperus monosperma</i>         | 1,-2,12,11,3,4,5,8,-10,-9,13,-7,-6,14,15 |
| <i>Juniperus formosana</i>          | 1,2,12,11,3,4,5,8,-10,-9,13,-7,-6,14,15  |
| <i>Cupressus sempervirens</i>       | 1,-2,12,11,3,4,5,8,-10,-9,13,-7,-6,14,15 |
| <i>Hesperocyparis glabra</i>        | 1,-2,12,11,3,4,5,8,-10,-9,13,-7,-6,14,15 |
| <i>Callitropsis nootkatensis</i>    | 1,-2,12,11,3,4,5,8,-10,-9,13,-7,-6,14,15 |
| <i>Xanthocyparis vietnamensis</i>   | 1,-2,12,11,3,4,5,8,-10,-9,13,-7,-6,14,15 |
| <i>Platyclusus orientalis</i>       | 1,-2,12,11,3,4,5,8,-10,-9,13,-7,-6,14,15 |
| <i>Calocedrus formosana</i>         | 1,-2,12,11,3,4,5,8,-10,-9,13,-7,-6,14,15 |
| <i>Calocedrus macrolepis</i>        | 1,-2,12,11,3,4,6,7,-13,9,10,-8,-5,14,15  |
| <i>Fokienia hodginsii</i>           | 1,2,12,11,3,4,5,6,7,-13,-10,-14,8,9,15   |
| <i>Chamaecyparis lawsoniana</i>     | 1,2,12,11,3,4,5,6,7,-13,-10,-14,8,9,15   |
| <i>Thuja standishii</i>             | 1,2,12,11,3,4,5,6,7,-14,8,-10,-9,13,15   |
| <i>Thujopsis dolabrata</i>          | 1,-2,12,11,3,4,5,6,7,-14,8,-10,-9,13,15  |
| <i>Cryptomeria japonica</i>         | 1,2,12,11,3,4,5,8,9,10,-6,-7,13,14,15    |
| <i>Metasequoia glyptostroboides</i> | 1,-2,12,11,3,4,5,6,7,8,9,10,13,14,15     |
| <i>Taiwania flousiana</i>           | 1,2,12,11,3,4,5,6,7,8,9,10,13,14,15      |
| <i>Taiwania cryptomerioides</i>     | 1,2,12,11,3,4,5,6,7,8,9,10,13,14,15      |
| <i>Cunninghamia lanceolata</i>      | 1,2,3,4,5,6,7,8,9,10,11,12,13,14,15      |

Species are arranged by their divergence in the phylogenetic tree shown in Fig. 1.

Table S5. Primers used in this study

| Primer name     | Primer sequence               |
|-----------------|-------------------------------|
| <i>chlB</i>     | 5'-GTTCCAATATGAGCAGGACCAG-3'  |
| <i>rps4</i>     | 5'-CCTGGTAAAGTTTTGABACG-3'    |
| <i>psbK</i>     | 5'-CAAATGAAAAGCGGCATCG-3'     |
| <i>trnL-UAA</i> | 5'-GTTTCCATACCAAGGCTC-3'      |
| <i>ycf2</i>     | 5'-TTGCTCAAGGGAGAAAGGGAAA-3'  |
| <i>rpl23</i>    | 5'-ATCTTACGCAACGGATCATTCT-3'  |
| <i>trnL-CAA</i> | 5'-CTTGATGGTGGGAATGGTAGACA-3' |
| <i>accD</i>     | 5'-GAAAAGTATAGGATAATGAAT-3'   |

Table S6. Comparisons of specific characteristics of *trnQ*-IR in ten newly sequenced plastomes of Cupressoideae

| Species                          | Similarity | Alignment length | True length (L) | True length (R) | Start_1 | End_1 | Start_2 | End_2  | Containing gene | Inversion length (bp) |
|----------------------------------|------------|------------------|-----------------|-----------------|---------|-------|---------|--------|-----------------|-----------------------|
| <i>Juniperus formosana</i>       | 93.91      | 279              | 278             | 267             | 6,760   | 7,037 | 43,270  | 43,004 | <i>trnQ-UUG</i> | 35,967                |
| <i>Hesperocypris glabra</i>      | 99.26      | 270              | 270             | 269             | 6,610   | 6,879 | 42,786  | 42,518 | <i>trnQ-UUG</i> | 35,639                |
| <i>Xanthocypris vietnamensis</i> | 99.25      | 266              | 266             | 266             | 6,591   | 6,856 | 43,269  | 43,004 | <i>trnQ-UUG</i> | 36,148                |
| <i>Platycladus orientalis</i>    | 95.82      | 239              | 236             | 238             | 6,636   | 6,871 | 43,299  | 43,062 | <i>trnQ-UUG</i> | 36,191                |
| <i>Calocedrus formosana</i>      | 98.79      | 248              | 248             | 248             | 6,777   | 7,024 | 43,266  | 43,019 | <i>trnQ-UUG</i> | 35,995                |
| <i>Calocedrus macrolepis</i>     | 99.19      | 248              | 248             | 248             | 6,790   | 7,037 | 43,306  | 43,059 | <i>trnQ-UUG</i> | 36,022                |
| <i>Fokienia hodginsii</i>        | 99.57      | 233              | 233             | 233             | 6,765   | 6,997 | 43,533  | 43,301 | <i>trnQ-UUG</i> | 36,304                |
| <i>Chamaecypris lawsoniana</i>   | 98.80      | 249              | 248             | 249             | 6,742   | 6,989 | 43,480  | 43,232 | <i>trnQ-UUG</i> | 36,243                |
| <i>Thuja standishii</i>          | 88.14      | 194              | 194             | 178             | 7,593   | 7,786 | 45,435  | 45,258 | <i>trnQ-UUG</i> | 37,472                |
| <i>Thujopsis dolabrata</i>       | 100.00     | 196              | 196             | 196             | 6,995   | 7,190 | 44,516  | 44,321 | <i>trnQ-UUG</i> | 37,131                |

Species are arranged by their divergence in the phylogenetic tree shown in Fig. 1.
